# Supplementary material for: GOLPH3 modulates expression and alternative splicing of transcription factors associated with endometrial decidualization in human endometrial stromal cells
Source: PeerJ. 2023 Mar 20;11:e15048. doi: 10.7717/peerj.15048 (PMC10035422; doi:10.7717/peerj.15048)
Supplement: Supplemental Information 1 [file peerj-11-15048-s001.xlsx]

## Sheet: 数据分析1
Ct值统计表和结果分析
Sample Name	Target Name	Ct值	平均Ct值
正常	β-action	18.3826	18.4589
正常	β-action	18.8051
正常	β-action	18.189
NC	β-action	18.7169	18.6667
NC	β-action	18.4228
NC	β-action	18.8603
SiRNA1	β-action	18.2263	18.3713
SiRNA1	β-action	18.2423
SiRNA1	β-action	18.6454
SiRNA2	β-action	18.3388	18.1937
SiRNA2	β-action	18.2277
SiRNA2	β-action	18.0145
SiRNA3	β-action	18.1152	18.3784
SiRNA3	β-action	18.4349
SiRNA3	β-action	18.5852
Sample Name	Target Name	Ct值	平均Ct值	Target Name	Ct值	平均Ct值			RQ
正常	GOLPH3	27.247	27.1416	β-action	18.3826	18.4589	8.68271	0	1		GOLPH3
正常	GOLPH3	27.1073		β-action	18.8051					正常	1
正常	GOLPH3	27.0704		β-action	18.189					NC	1.02908
NC	GOLPH3	27.3561	27.308	β-action	18.7169	18.6667	8.64135	-0.0413552	1.02908	SiRNA1	0.800131
NC	GOLPH3	27.3249		β-action	18.4228					SiRNA2	0.231731
NC	GOLPH3	27.2431		β-action	18.8603					SiRNA3	0.543546
SiRNA1	GOLPH3	27.4467	27.3757	β-action	18.2263	18.3713	9.0044	0.321692	0.800131
SiRNA1	GOLPH3	27.3913		β-action	18.2423
SiRNA1	GOLPH3	27.2891		β-action	18.6454
SiRNA2	GOLPH3	28.9934	28.9859	β-action	18.3388	18.1937	10.7922	2.10948	0.231731
SiRNA2	GOLPH3	28.9792		β-action	18.2277
SiRNA2	GOLPH3	28.985		β-action	18.0145
SiRNA3	GOLPH3	27.9328	27.9406	β-action	18.1152	18.3784	9.56223	0.879525	0.543546
SiRNA3	GOLPH3	27.9924		β-action	18.4349
SiRNA3	GOLPH3	27.8967		β-action	18.5852

## Sheet: 数据分析2
Ct value statistics and results analysis
Sample Name	Target Name	Ct value	mean CT number
control	β-action	18.3172	18.5095
control	β-action	18.6606
control	β-action	18.5506
knock down	β-action	18.7311	18.2863
knock down	β-action	18.1029
knock down	β-action	18.0249
over expression	β-action	18.0007	18.2442
over expression	β-action	18.0259
over expression	β-action	18.7062
Sample Name	Target Name	Ct value	mean CT number	Target Name	Ct value	mean CT number			RQ
control	GOLPH3	28.2558	28.5152	β-action	18.3172	18.5095	10.0057	0	1
control	GOLPH3	28.5646		β-action	18.6606
control	GOLPH3	28.7251		β-action	18.5506
knock down	GOLPH3	28.1582	28.2752	β-action	18.7311	18.2863	9.98896	-0.0167291	1.01166
knock down	GOLPH3	28.3925		β-action	18.1029
knock down	GOLPH3	28.275		β-action	18.0249
over expression	GOLPH3	26.3933	26.3964	β-action	18.0007	18.2442	8.15218	-1.85351	3.61377
over expression	GOLPH3	26.28		β-action	18.0259
over expression	GOLPH3	26.5159		β-action	18.7062
